# Supplementary material for: Weberite Na2MM′F7 (M, M′ = redox-active metal) as promising fluoride-based sodium-ion battery cathodes
Source: Royal Society of Chemistry journal article supplement (doi:10.1039/d4ta01895h), 2024-01-01
Supplement: d4ta01895h1.pdf [file d4ta01895h1.pdf]

## Supporting Information

for

### **Weberite $\text{Na}_2\text{MM}'\text{F}_7$ (M, M' = Redox-Active Metal) as Promising Fluoride-Based Sodium-Ion Battery Cathodes**

Tenglong Lu<sup>1,2</sup>, Sheng Meng<sup>1,2,3\*</sup>, Miao Liu<sup>1,3,4\*</sup>

<sup>1</sup>*Beijing National Laboratory for Condensed Matter Physics, Institute of Physics, Chinese Academy of Sciences, Beijing 100190, China*

<sup>2</sup>*School of Physical Sciences, University of Chinese Academy of Sciences, Beijing 100190, China*

<sup>3</sup>*Songshan Lake Materials Laboratory, Dongguan, Guangdong 523808, China*

<sup>4</sup>*Center of Materials Science and Optoelectronics Engineering, University of Chinese Academy of Sciences, Beijing 100049, China*

*\*Corresponding author: smeng@iphy.ac.cn, mliu@iphy.ac.cn*

## (I) Polymorphism of weberite-type sodium metal fluorides

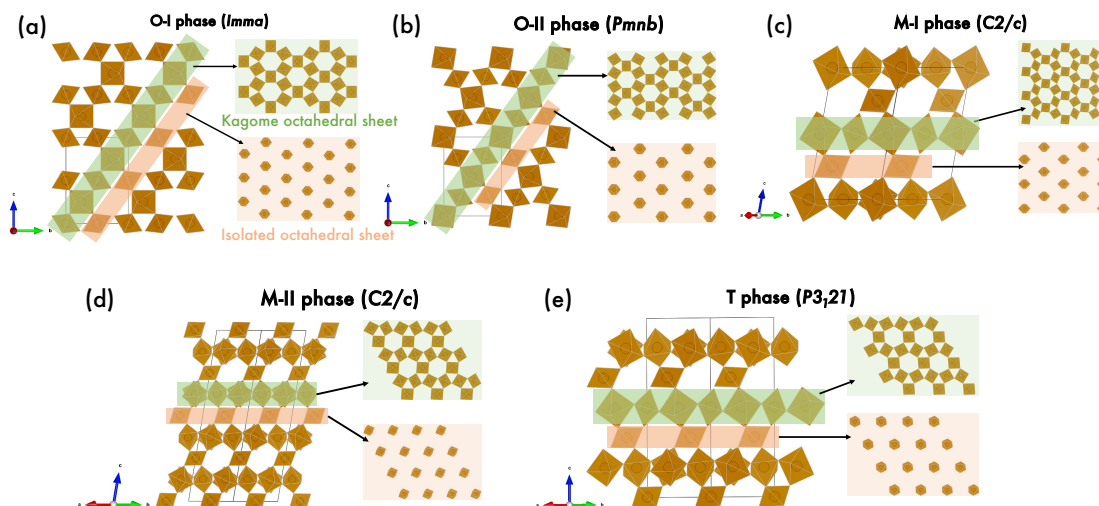

**Figure S1.** Topological analysis of the structural frameworks of the five polymorphs of weberite  $\text{Na}_2\text{Fe}_2\text{F}_7$ . Structural frameworks of (a) O-I phase, (b) O-II phase, (c) M-I phase, (d) M-II phase, and (e) T phase. The Kagome octahedral sheet and isolated octahedral sheet are labeled by green and pink boxes, respectively.

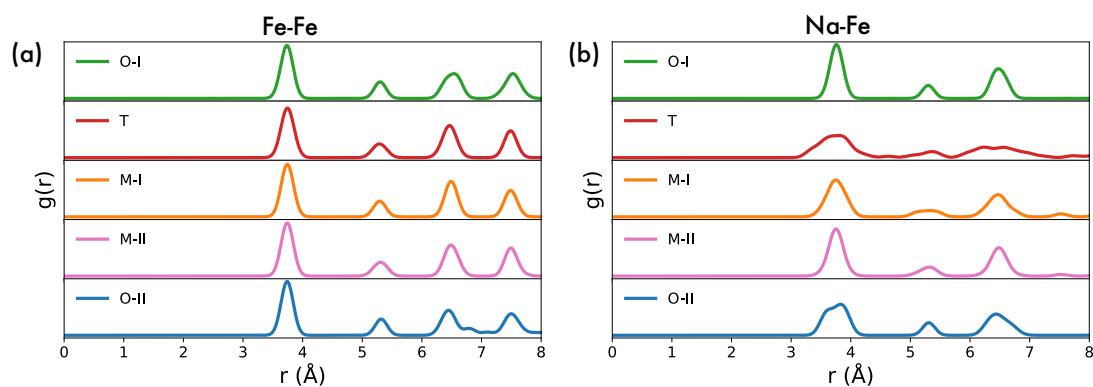

**Figure S2.** (a) Fe-Fe and (b) Na-Fe radial distribution function,  $g(r)$ , for the five polymorphs of weberite  $\text{Na}_2\text{Fe}_2\text{F}_7$ .

**Table S1.** Thermodynamic properties among 33 metal pairs for all five polymorphs of weberite compounds.

| Metal pair | $E_{hull}$ (meV) |        |        |        |        | Standard deviation (meV) |
|------------|------------------|--------|--------|--------|--------|--------------------------|
|            | O-I              | O-II   | M-I    | M-II   | T      |                          |
| Ti-Ti      | 56.48            | 55.57  | 57.08  | 60.81  | 58.05  | 1.797                    |
| Ti-V       | 40.21            | 45.15  | 42.09  | 41.18  | 40.14  | 1.845                    |
| Ti-Ni      | 131.77           | 127.67 | 129.21 | 124.65 | 129.73 | 2.372                    |
| V-Ti       | 32.56            | 30.63  | 30.97  | 30.95  | 32.49  | 0.831                    |
| V-V        | 2.18             | 0.62   | 0.00   | 0.49   | 0.62   | 0.738                    |
| V-Cr       | 4.27             | 3.16   | 2.00   | 2.12   | 2.05   | 0.884                    |
| V-Ni       | 16.77            | 16.64  | 18.80  | 15.58  | 19.77  | 1.535                    |
| Cr-V       | 18.66            | 8.40   | 6.38   | 11.29  | 12.26  | 4.186                    |
| Cr-Cr      | 5.78             | 1.44   | 0.00   | 4.12   | 2.76   | 2.016                    |
| Cr-Mn      | 10.27            | 10.34  | 13.90  | 10.35  | 17.51  | 2.876                    |
| Cr-Fe      | 0.00             | 0.50   | 8.74   | 4.63   | 6.90   | 3.448                    |
| Cr-Ni      | 22.13            | 22.71  | 24.60  | 20.96  | 24.21  | 1.341                    |
| Cr-Cu      | 10.15            | 10.13  | 9.12   | 9.23   | 14.27  | 1.897                    |
| Mn-Ti      | 46.38            | 43.24  | 43.78  | 43.90  | 43.46  | 1.139                    |
| Mn-V       | 20.67            | 18.49  | 14.83  | 11.84  | 13.68  | 3.225                    |
| Mn-Cr      | 8.17             | 6.21   | 4.07   | 5.37   | 4.21   | 1.503                    |
| Mn-Mn      | 23.60            | 23.25  | 23.61  | 22.28  | 20.36  | 1.228                    |
| Mn-Fe      | 19.91            | 16.23  | 14.31  | 15.94  | 14.86  | 1.960                    |
| Mn-Ni      | 9.79             | 10.54  | 11.77  | 12.16  | 13.59  | 1.319                    |
| Fe-Ti      | 85.89            | 84.50  | 84.03  | 85.75  | 90.44  | 2.274                    |
| Fe-V       | 7.11             | 2.65   | 3.22   | 5.95   | 5.42   | 1.681                    |
| Fe-Cr      | 6.91             | 3.19   | 3.35   | 4.51   | 5.44   | 1.382                    |
| Fe-Fe      | 5.94             | 4.15   | 1.15   | 2.01   | 0.00   | 2.13                     |
| Fe-Ni      | 20.91            | 22.07  | 24.76  | 20.70  | 29.26  | 3.205                    |
| Fe-Cu      | 10.92            | 11.72  | 11.26  | 9.73   | 15.36  | 1.897                    |
| Ni-Ti      | 103.98           | 103.87 | 106.65 | 104.42 | 108.03 | 1.663                    |
| Ni-Cr      | 0.27             | 0.31   | 1.99   | 0.00   | 3.69   | 1.408                    |
| Ni-Mn      | 2.47             | 1.57   | 0.00   | 1.05   | 1.14   | 0.802                    |
| Ni-Fe      | 0.88             | 0.00   | 2.19   | 0.77   | 3.98   | 1.397                    |
| Ni-Ni      | 2.83             | 0.00   | 7.99   | 0.513  | 10.91  | 4.297                    |
| Cu-Cr      | 5.74             | 0.00   | 2.02   | 6.21   | 5.72   | 2.483                    |
| Cu-Fe      | 7.30             | 1.49   | 3.89   | 8.30   | 12.46  | 3.771                    |
| Cu-Cu      | 3.90             | 7.87   | 11.02  | 0.00   | 2.55   | 3.919                    |

## (II) Detailed Crystal Structure Information for T-Na<sub>2</sub>MM'F<sub>7</sub>

### Compound

Crystal structure: Trigonal

Space group: *P3<sub>1</sub>21* (152)

Lattice parameters: a = b = 7.3774 Å, c = 18.2288 Å

Volume: 859.2 Å<sup>3</sup>

**Table S2.** Detailed structural information of T-Na<sub>2</sub>MM'F<sub>7</sub> compound.[1, 2]

| Atom | Wyckoff position | x     | y     | z       | Occupancy |
|------|------------------|-------|-------|---------|-----------|
| M'1  | 3a               | 0.337 | 0     | 0.33333 | 1         |
| M'2  | 3b               | 0.337 | 0     | 0.83333 | 1         |
| M    | 6c               | 0.480 | 0.842 | 0.1688  | 1         |
| Na1  | 6c               | 0.523 | 0.849 | 0.6653  | 1         |
| Na2  | 6c               | 0.949 | 0.186 | 0.3357  | 0.5       |
| Na3  | 6c               | 0.902 | 0.169 | 0.8626  | 0.5       |
| F1   | 6c               | 0.754 | 0.203 | 0.601   | 1         |
| F2   | 6c               | 0.798 | 0.965 | 0.9487  | 1         |
| F3   | 6c               | 0.566 | 0.413 | 0.0544  | 1         |
| F4   | 6c               | 0.831 | 0.452 | 0.187   | 1         |
| F5   | 6c               | 0.048 | 0.334 | 0.2729  | 1         |
| F6   | 6c               | 0.224 | 0.230 | 0.1460  | 1         |
| F7   | 6c               | 0.066 | 0.444 | 0.8546  | 1         |

### (III) Evaluation of thermal stability

Oxygen release is one of the biggest safety concerns for oxide cathode materials, which can easily combust flammable organic electrolytes and eventually lead to fire. Given the even more violent exothermic processes that may occur in fluoride chemistry, this gas-releasing issue should also be treated with caution in fluoride cathodes. In this work, we analyzed the thermal safety of fluoride cathode materials by calculating the critical fluorine chemical potential ( $\mu_{F_2}$ ) at which the cathode begins to evolve fluorine gas. This methodology was modified from a previous work which investigated the thermal stability of  $\text{LiMnPO}_4$  and  $\text{LiFePO}_4$ , [3, 4] and was described in detail below.

In an open system concerning fluorine, alterations in phase equilibria are predominantly due to reactions that involve the uptake or release of fluorine gas. The entropy of fluorine gas primarily dominates the reaction entropy in such reactions, with changes in fluorine chemical potential largely capturing the impact of temperature. The effect of temperature and partial pressure is mostly captured by changes in the fluorine chemical potential, as follows:

$$\begin{aligned}\mu_{F_2}(T, p_{F_2}) &= \mu_{F_2}(T, p_0) + kT \ln \frac{p_{F_2}}{p_0} \\ &= E_{F_2} + kT - TS_{F_2}^{T, p_0} + kT \ln \frac{p_{F_2}}{p_0}\end{aligned}\quad (S1)$$

where  $p_{F_2}$  is the fluorine partial pressure,  $p_0$  is a reference fluorine partial pressure,  $S_{F_2}^{T, p_0}$  is the fluorine entropy,  $E_{F_2}$  is the fluorine internal energy, and  $k$  is Boltzmann's constant. We set the reference fluorine chemical potential to be zero at 298 K and 1 atm. For fluorine gas, its experimental entropy data (at 0.1 MPa) under temperatures were obtained from NIST-JANAF thermochemical table.[5]

For each compound, we constructed a grand potential phase diagram at constant  $\mu_{F_2}$  in the corresponding chemical space. Through evolving the phase diagram under different  $\mu_{F_2}$ , the critical chemical potential at which the compound begins to release fluorine gas can be determined. Further, the gas-releasing temperature can be calculated

through Eq. S1. Note that given the differences between the simulated and real environments, no expectation should be taken of the accuracy of the quantitative value of the gas-releasing temperature. Nonetheless, our theoretical predictions can still provide insights on general trends. For instance, our results in Fig. 2 showed that compounds containing  $\text{Fe}^{4+}$  or  $\text{Ni}^{4+}$  generally exhibit poor thermal stability, which can be easily understood: the nonbonding  $t_{2g}$  orbitals of  $\text{Fe}^{4+}$  and  $\text{Ni}^{4+}$  are so low in energy (corresponding to high redox potentials in Fig. 8a) that fluorine 2p bands begin to participate in the oxidation process, resulting in the fluorine gas releasing. This coincidence between calculations and physical intuition gave us confidence in the validity of our predictions.

Besides thermal stability, chemical decomposition of compounds under the air environment is another safety issue. Based on the consideration that bond dissociation energies (under ambient conditions) of M-F bonds (M stands for metals considered in this work) are generally larger than those of M-O bonds (e.g., 423 kJ/mol for Mn-F vs. 402 kJ/mol for Mn-O, 435 kJ/mol for Ni-F vs. 391.6 kJ/mol for Ni-O),[6] we believed that compounds included in this work should be chemical stable under air environments, at least when temperature is not too high. As shown in a recent work,[7] researchers showed that the  $\text{Na}_2\text{MnVF}_7$  compound did not decompose until the temperature reached 350 °C, which is far beyond the upper limit of the typical operating temperature of cells.

## (IV) Pseudo-binary phase diagrams for compounds with high energy density

Our screening procedure returned a total of 10 compounds. Figure S3 shows their pseudo-binary phase diagrams between charged and discharged end members. Note that there may be different redox reaction pathways for different systems (see x axis of each panel in Fig. S3). For instance,  $\text{Na}_2\text{MnVF}_7$  compound should be electrochemically cycled between  $\text{MnVF}_7$  and  $\text{Na}_2\text{MnVF}_7$  end members, but  $\text{Na}_2\text{MnNiF}_7$  should be cycled between  $\text{NaMnNiF}_7$  and  $\text{Na}_3\text{MnNiF}_7$  end members instead.

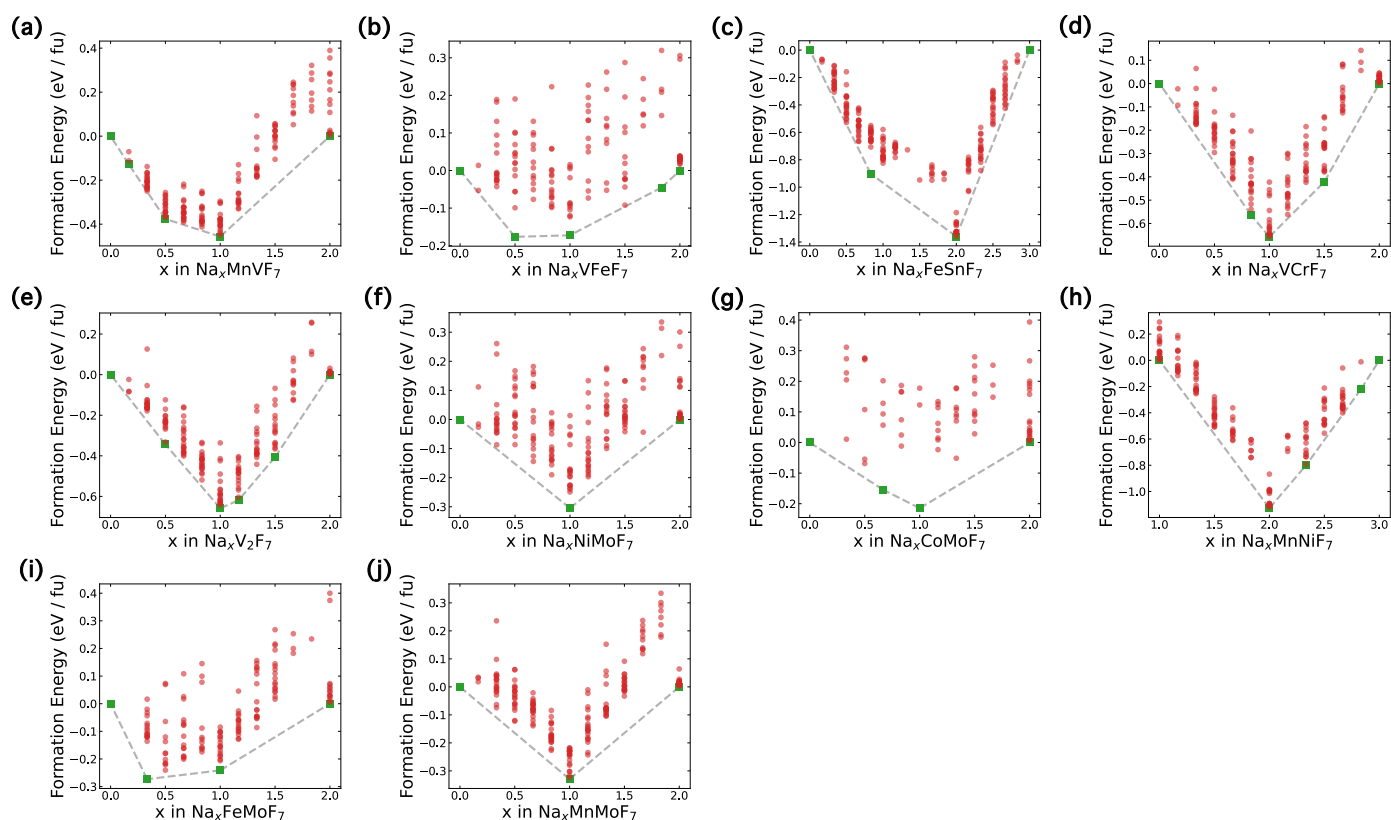

**Figure S3.** Pseudo-binary phase diagrams for screened compounds with high energy density. For different chemical systems, there may be different redox reaction pathways (see x axis of each panel in the figure).

## (V) Migration barriers for compounds with high energy density

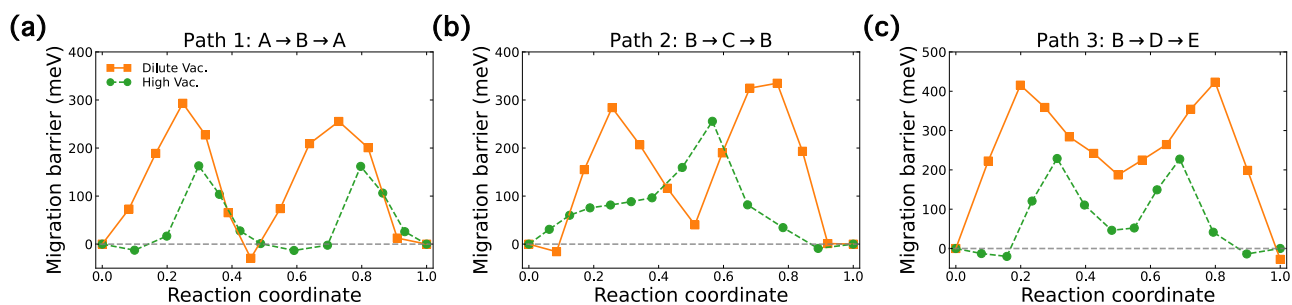

Figure S4. Migration barriers of  $\text{Na}_2\text{MnVF}_7$  along three paths under dilute and high vacancy limits.

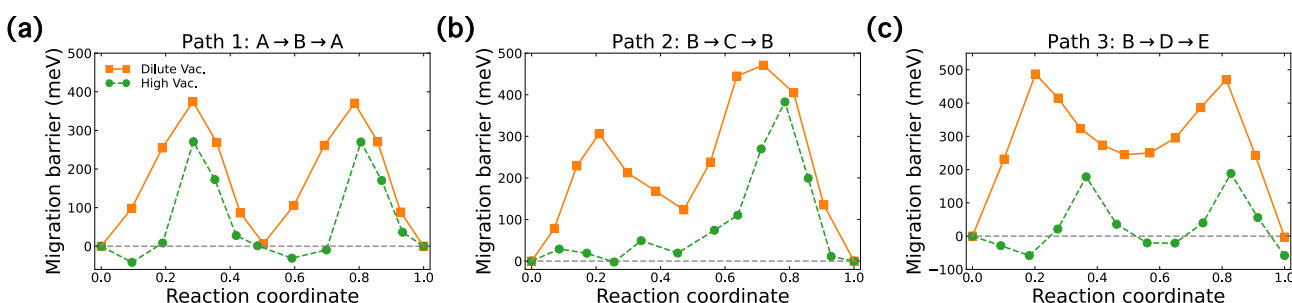

Figure S5. Migration barriers of  $\text{Na}_2\text{VFeF}_7$  along three paths under dilute and high vacancy limits.

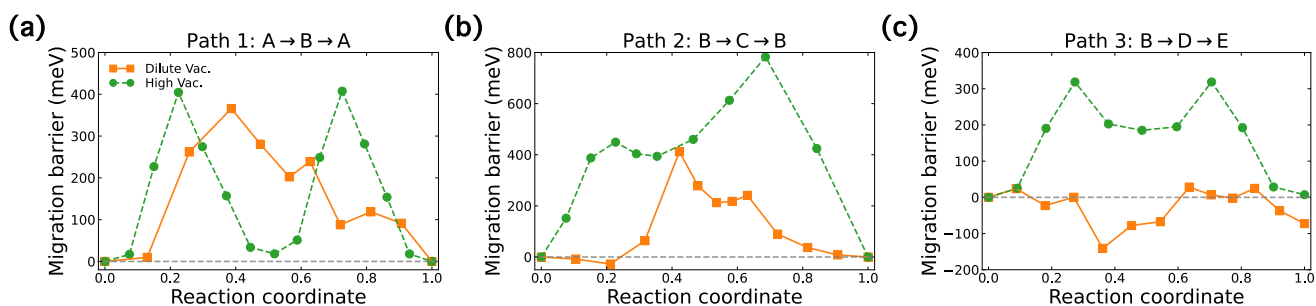

Figure S6. Migration barriers of  $\text{Na}_2\text{FeSnF}_7$  along three paths under dilute and high vacancy limits.

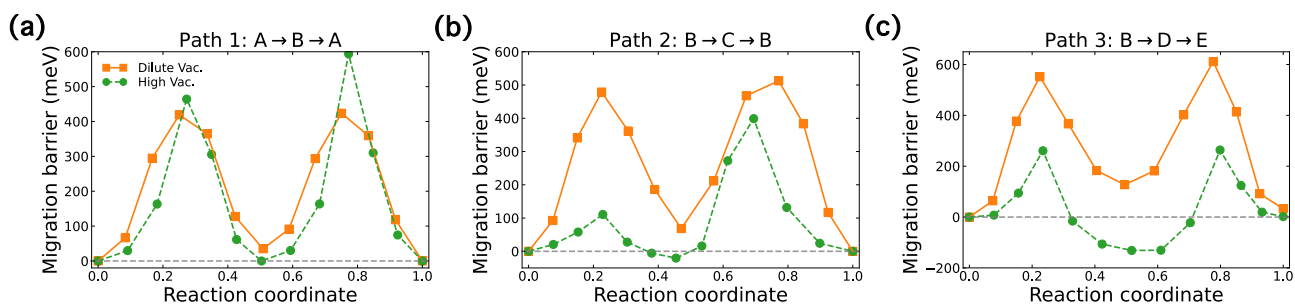

Figure S7. Migration barriers of  $\text{Na}_2\text{VCrF}_7$  along three paths under dilute and high vacancy limits.



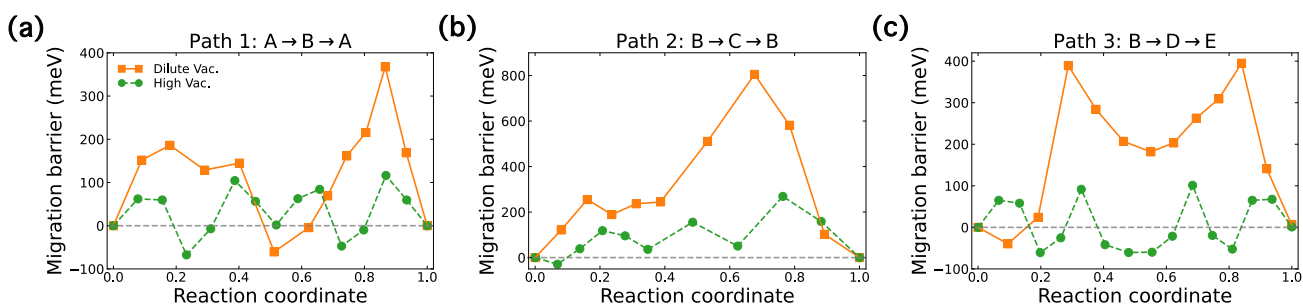

**Figure S8. Migration barriers of  $\text{Na}_2\text{NiMoF}_7$  along three paths under dilute and high vacancy limits.**

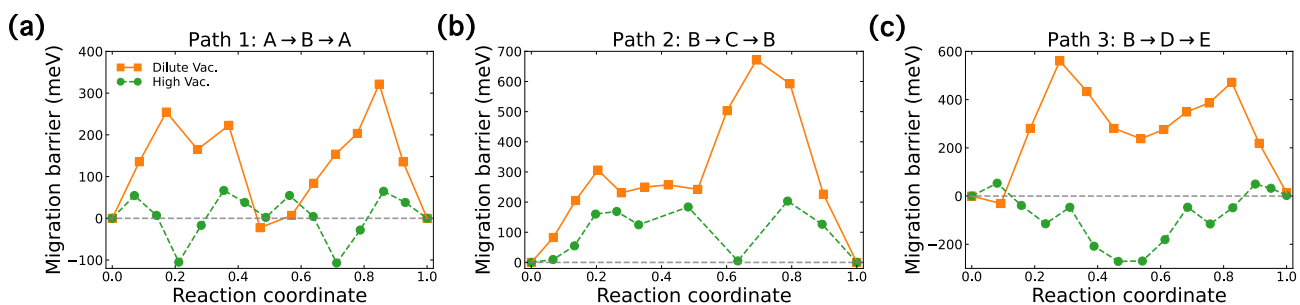

**Figure S9. Migration barriers of  $\text{Na}_2\text{CoMoF}_7$  along three paths under dilute and high vacancy limits.**

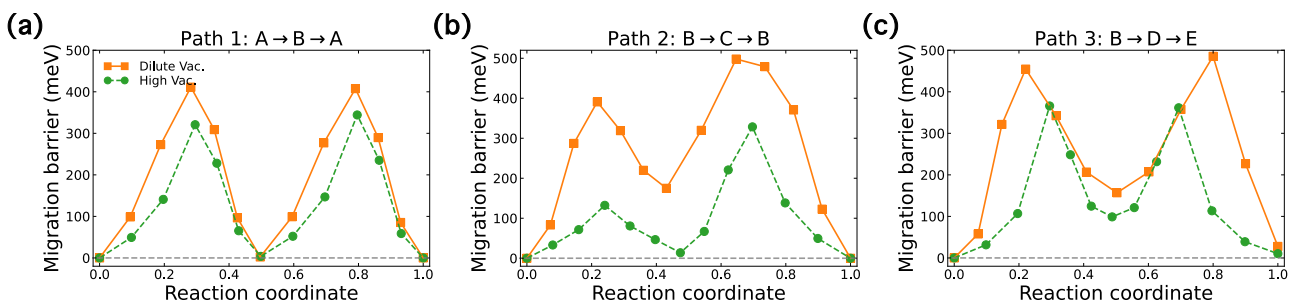

**Figure S10. Migration barriers of  $\text{Na}_2\text{MnNiF}_7$  along three paths under dilute and high vacancy limits.**

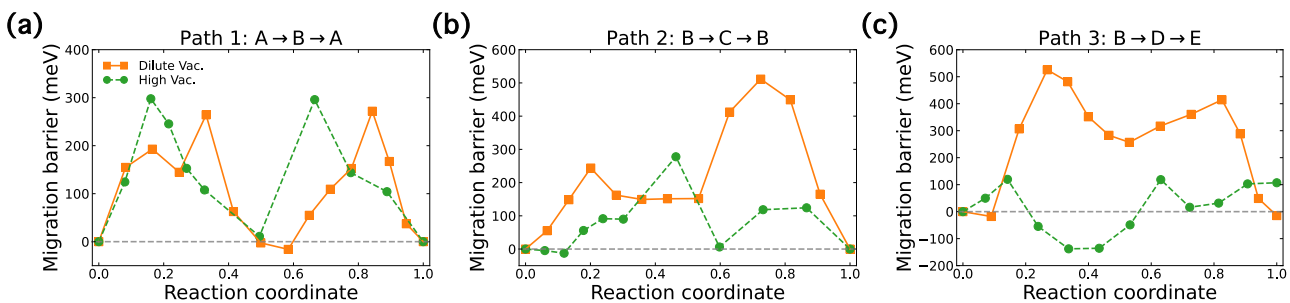

**Figure S11. Migration barriers of  $\text{Na}_2\text{FeMoF}_7$  along three paths under dilute and high vacancy limits.**

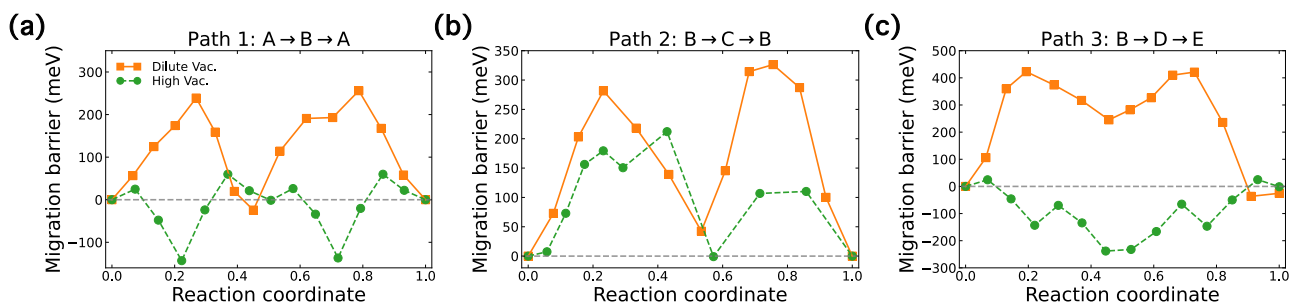

Figure S12. Migration barriers of  $\text{Na}_2\text{MnMoF}_7$  along three paths under dilute and high vacancy

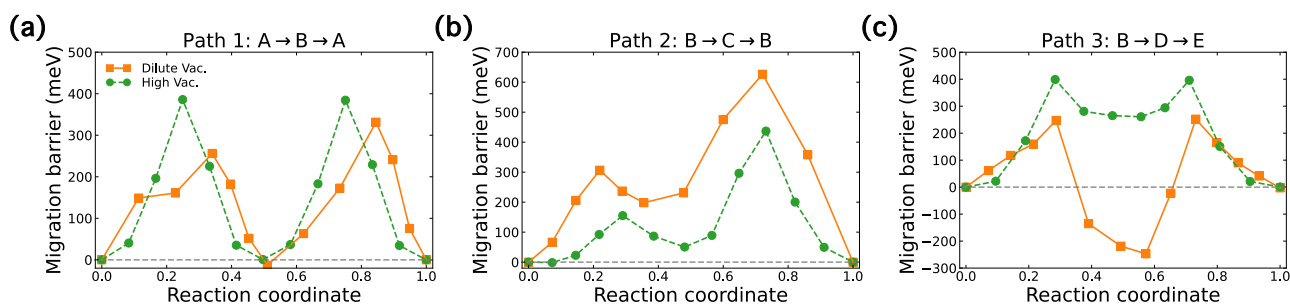

Figure S13. Migration barriers of  $\text{Na}_2\text{TiFeF}_7$  along three paths under dilute and high vacancy limits.

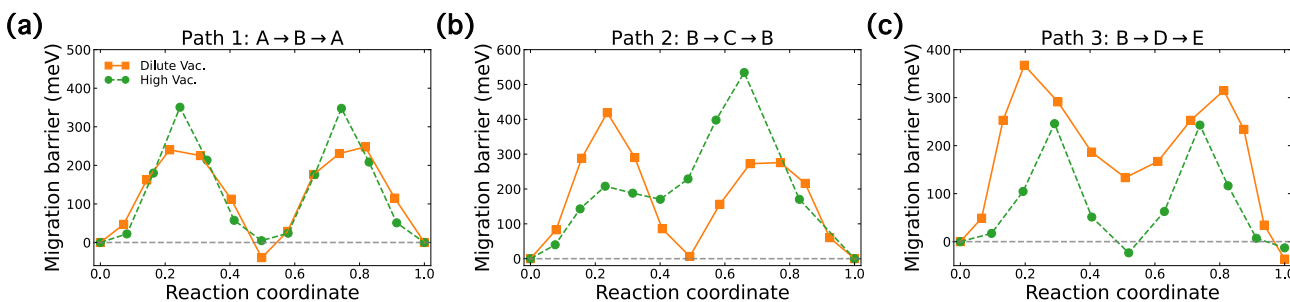

Figure S14. Migration barriers of  $\text{Na}_2\text{Fe}_2\text{F}_7$  along three paths under dilute and high vacancy limits.

## (VI) Explanation for 4.7 V equilibrium potential in $\text{Na}_2\text{MnVF}_7$ voltage profile

As shown in the Fig. 6a, we predicted an unexpected equilibrium voltage plateau of about 4.7 V for  $\text{Na}_2\text{MnVF}_7$ . This 4.7 V voltage is related to the  $\text{V}^{4+}/\text{V}^{5+}$  redox couple, implying half of the Mn ions in the compound are still in the oxidation state of +2 at the end state of charge. As described in the main text, this is a surprising phenomenon because  $\text{Mn}^{2+}$  ion should be oxidized preferentially over  $\text{V}^{4+}$  ion ( $\sim 4$  V redox-potential for  $\text{Mn}^{2+}/\text{Mn}^{3+}$  versus  $\sim 4.7$  V for  $\text{V}^{4+}/\text{V}^{5+}$ , see Fig. 8a). In the following part of this section, we will explain this phenomenon from a structural point of view.

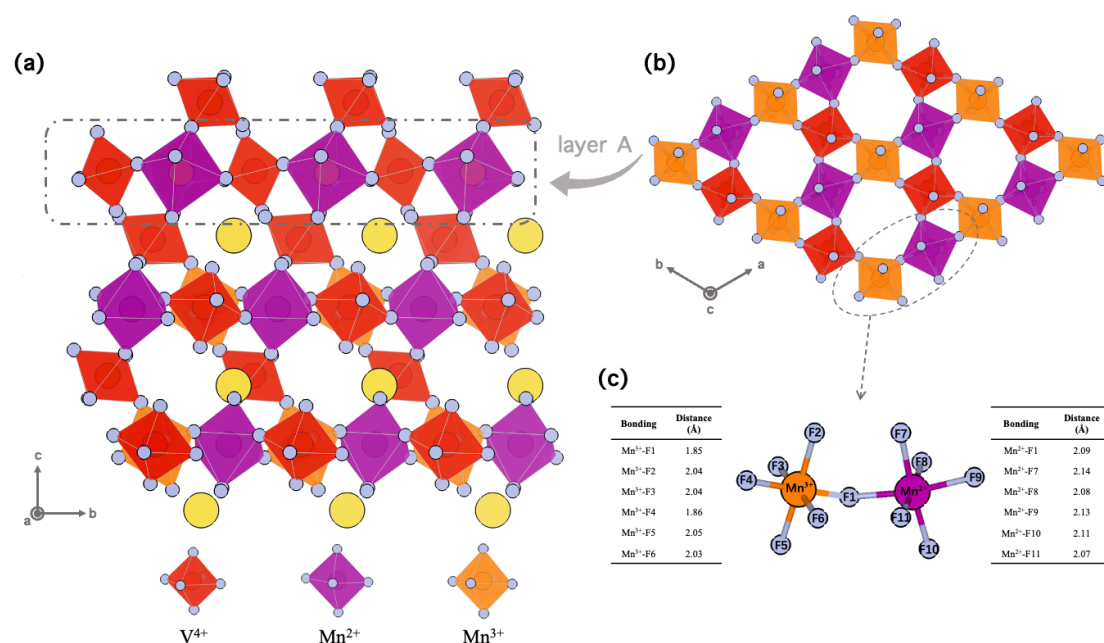

**Figure S15.** (a) Detailed crystal structure of  $\text{Na}_{0.5}\text{MnVF}_7$  compound, in which V is in the oxidation state of +4 (red), Mn is in the oxidation state of +2 (purple) or +3 (orange). (b) Detailed structure of stacking layer A, viewing along the [001] direction. (c) Bonding distances for  $\text{Mn}^{3+}\text{F}_6$ , and  $\text{Mn}^{2+}\text{F}_6$  Octahedrons.

In Fig. S15a, we exhibited the detailed crystal structure of  $\text{Na}_{0.5}\text{MnVF}_7$ , which is one of the stable phases in the pseudo-binary  $\text{MnVF}_7\text{-Na}_2\text{MnVF}_7$  phase diagram ( $\text{Na}_{0.5}\text{MnVF}_7$  in Fig. S3a). In the  $\text{Na}_{0.5}\text{MnVF}_7$  crystal structure, all of the V ions are in the +4 oxidation state, and half of the Mn ions are in the +3 oxidation state (the rest are in the +2 oxidation state). Normally speaking, as the desodiated process proceeds, the

remaining half of  $\text{Mn}^{2+}$  should be gradually oxidized to  $\text{Mn}^{3+}$  until there are only  $\text{Mn}^{3+}$  ions in the system at the end state of charge. However, as shown in the Fig. S15b, corner-sharing  $\text{Mn}^{3+}\text{F}_6$  and  $\text{Mn}^{2+}\text{F}_6$  octahedrons form an infinity chain along the [100] direction, leading to a strong structural coupling between  $\text{Mn}^{3+}$  and  $\text{Mn}^{2+}$  ions. Due to the Jahn-Teller effect, prominent structural distortions are expected to occur in  $\text{Mn}^{3+}\text{F}_6$  octahedrons. Indeed, as shown in Fig. S15c, two of the six  $\text{Mn}^{3+}\text{-F}$  bonds ( $\text{Mn}^{3+}\text{-F1}$  and  $\text{Mn}^{3+}\text{-F4}$ ) dramatically shrink. As a result, this structural distortion will make electron cloud of  $\text{F}^-$  closer to  $\text{Mn}^{3+}$  ions, which equivalently means that the electron cloud of  $\text{F}^-$  will be far away from  $\text{Mn}^{2+}$  ions. According to the crystal field theory, the energy of the antibonding  $e_g$  orbitals of  $\text{Mn}^{2+}$  (we don't consider possible orbital splitting for  $e_g$  here) should decline. With a relatively small energy difference between  $\text{V}^{4+}/\text{V}^{5+}$  and  $\text{Mn}^{2+}/\text{Mn}^{3+}$  orbitals, this energy decreases for  $\text{Mn}^{2+}$  orbitals may lead to an early activation of the nonbonding  $t_{2g}$  orbitals of  $\text{V}^{4+}$ . We drew a schematic diagram to illustrate this phenomenon, shown in Fig. S16a. A two-dimensional slice of the charge density of  $\text{Na}_{0.5}\text{MnVF}_7$  (along [001] direction) is displayed in Fig. S16b. From the contours of charge density, it is obvious that the electron cloud of  $\text{F}^-$  is closer to  $\text{Mn}^{3+}$  than  $\text{Mn}^{2+}$ , which further improve our arguments.

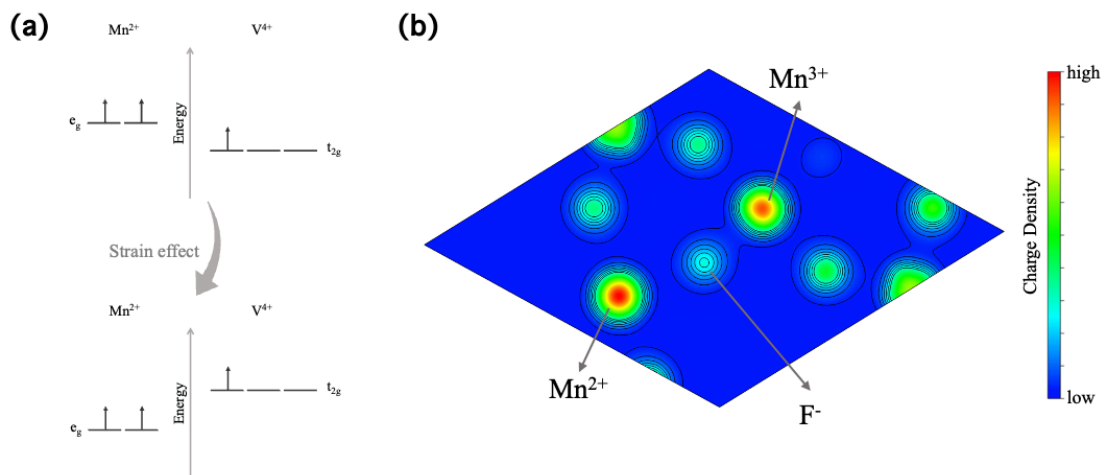

Figure S16. (a) A schematic diagram describing how the Jahn-Teller effect of  $\text{Mn}^{3+}$  affects the  $e_g$  orbitals of  $\text{Mn}^{2+}$ . (b) A two-dimensional slice of the charge density of  $\text{NaMn}_2\text{V}_2\text{F}_{12}$ .

## (VII) Evaluation of electronic conduction for T- $\text{Na}_2\text{MM}'\text{F}_7$ compounds

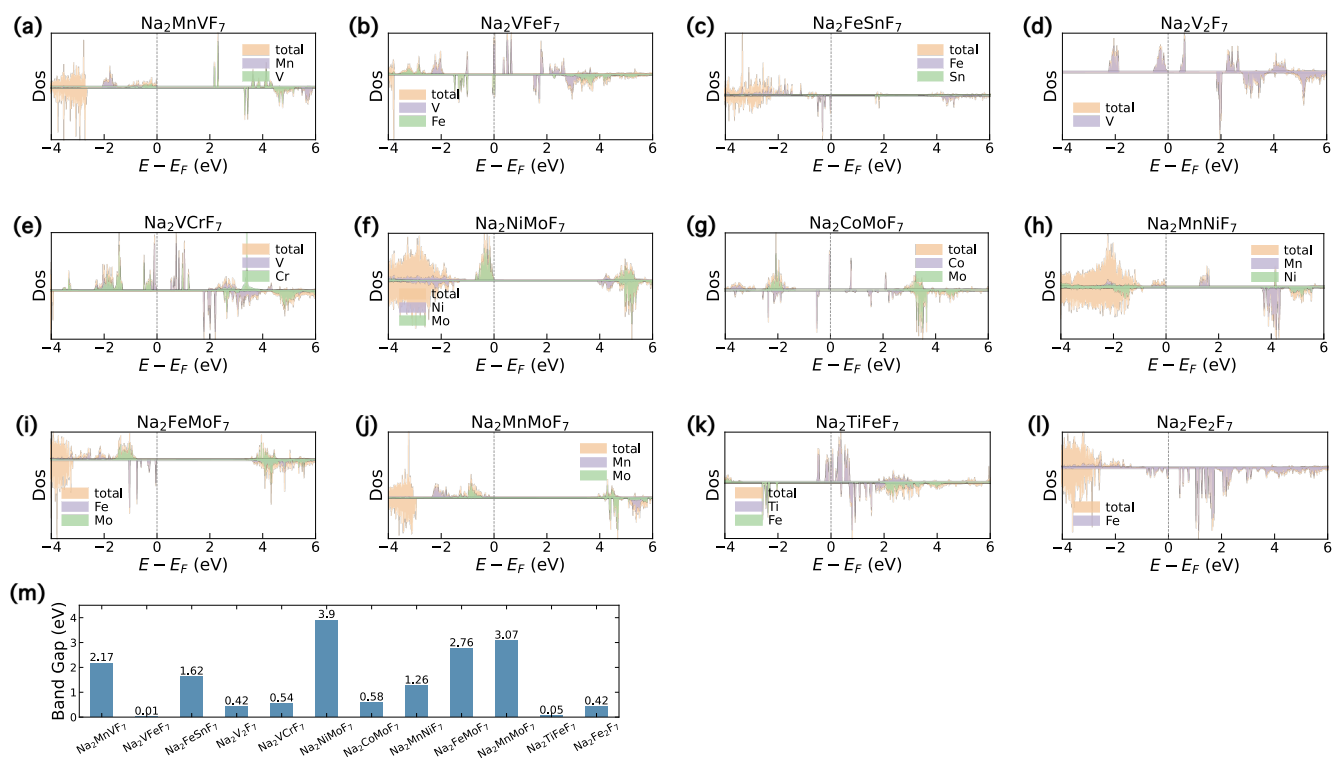

**Figure S17.** Density of states for (a)  $\text{Na}_2\text{MnVF}_7$ , (b)  $\text{Na}_2\text{VFeF}_7$ , (c)  $\text{Na}_2\text{FeSnF}_7$ , (d)  $\text{Na}_2\text{V}_2\text{F}_7$ , (e)  $\text{Na}_2\text{VCrF}_7$ , (f)  $\text{Na}_2\text{NiMoF}_7$ , (g)  $\text{Na}_2\text{CoMoF}_7$ , (h)  $\text{Na}_2\text{MnNiF}_7$ , (i)  $\text{Na}_2\text{FeMoF}_7$ , (j)  $\text{Na}_2\text{MnMoF}_7$ , (k)  $\text{Na}_2\text{TiFeF}_7$ , and (l)  $\text{Na}_2\text{Fe}_2\text{F}_7$ . (m) A band-gap histogram.

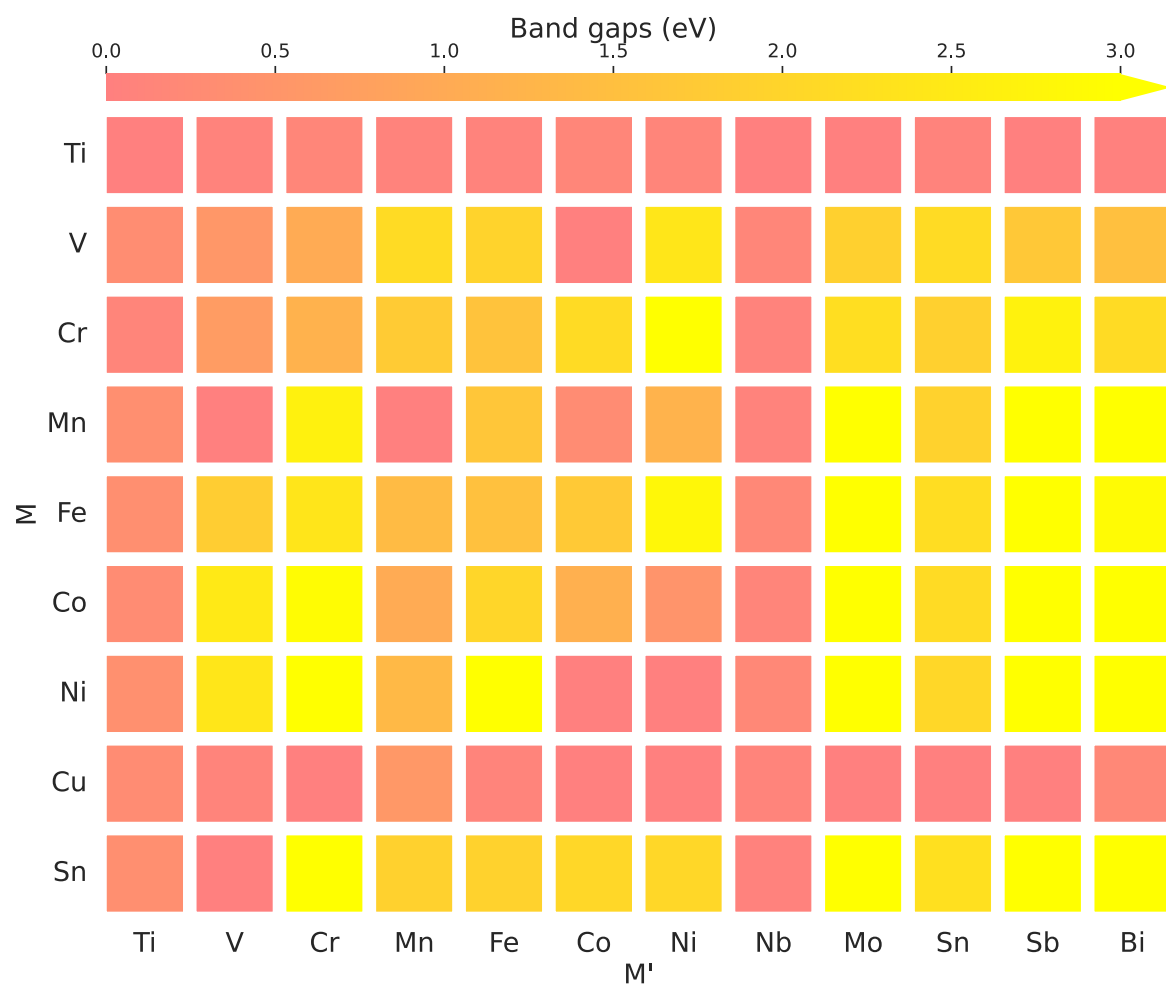

**Figure S18.** A heatmap of band gaps.

**(VIII) Quantitative electrochemical metrics of all the weberite-type compounds evaluated in this work**

**Table S3.** The quantitative electrochemical metrics of all weberite-type compounds depicted in Fig. 3a. It should be noted that this table only contains compounds that demonstrate moderate-to-high thermodynamic stability ( $E_{hull} < 100$  meV/atom).

| <b>Formula</b>                                 | <b>Cycling range</b> | <b>Average voltage (V)</b> | <b>Gravimetric capacity (mAh/g)</b> | <b>Specific energy (Wh/kg)</b> |
|------------------------------------------------|----------------------|----------------------------|-------------------------------------|--------------------------------|
| Na <sub>2</sub> MnVF <sub>7</sub>              | 0-2                  | 3.99                       | 199                                 | 795                            |
| Na <sub>2</sub> FeVF <sub>7</sub>              | 0-2                  | 3.65                       | 199                                 | 727                            |
| Na <sub>2</sub> SnFeF <sub>7</sub>             | 0-3                  | 2.86                       | 228                                 | 652                            |
| Na <sub>2</sub> CrVF <sub>7</sub>              | 0-2                  | 3.19                       | 202                                 | 645                            |
| Na <sub>2</sub> V <sub>2</sub> F <sub>7</sub>  | 0-2                  | 3.16                       | 204                                 | 646                            |
| Na <sub>2</sub> NiMoF <sub>7</sub>             | 0-2                  | 3.69                       | 166                                 | 615                            |
| Na <sub>2</sub> CoMoF <sub>7</sub>             | 0-2                  | 3.63                       | 168                                 | 609                            |
| Na <sub>2</sub> NiMnF <sub>7</sub>             | 1-3                  | 3.41                       | 178                                 | 609                            |
| Na <sub>2</sub> FeMoF <sub>7</sub>             | 0-2                  | 3.54                       | 169                                 | 600                            |
| Na <sub>2</sub> MnMoF <sub>7</sub>             | 0-2                  | 3.52                       | 168                                 | 595                            |
| Na <sub>2</sub> CoFeF <sub>7</sub>             | 1-3                  | 3.35                       | 176                                 | 590                            |
| Na <sub>2</sub> Sn <sub>2</sub> F <sub>7</sub> | 0-3                  | 2.98                       | 193                                 | 575                            |
| Na <sub>2</sub> FeSbF <sub>7</sub>             | 0-2                  | 3.64                       | 156                                 | 568                            |
| Na <sub>2</sub> Mn <sub>2</sub> F <sub>7</sub> | 1-3                  | 3.14                       | 179                                 | 562                            |
| Na <sub>2</sub> FeTiF <sub>7</sub>             | 0-2                  | 2.83                       | 202                                 | 575                            |
| Na <sub>2</sub> MnFeF <sub>7</sub>             | 1-3                  | 3.02                       | 178                                 | 537                            |
| Na <sub>2</sub> CrMoF <sub>7</sub>             | 0-2                  | 3.07                       | 170                                 | 522                            |
| Na <sub>2</sub> NiSbF <sub>7</sub>             | 0-2                  | 3.48                       | 149                                 | 519                            |
| Na <sub>2</sub> VMoF <sub>7</sub>              | 0-2                  | 3.04                       | 171                                 | 519                            |
| Na <sub>2</sub> CrSbF <sub>7</sub>             | 0-2                  | 3.29                       | 157                                 | 517                            |
| Na <sub>2</sub> CoSbF <sub>7</sub>             | 0-2                  | 3.42                       | 149                                 | 510                            |
| Na <sub>2</sub> VSnF <sub>7</sub>              | 0-2                  | 3.19                       | 159                                 | 507                            |
| Na <sub>2</sub> MnSbF <sub>7</sub>             | 0-2                  | 3.33                       | 151                                 | 503                            |
| Na <sub>2</sub> CrSnF <sub>7</sub>             | 0-2                  | 3.22                       | 153                                 | 492                            |
| Na <sub>2</sub> SnMoF <sub>7</sub>             | 0-2                  | 3.44                       | 140                                 | 482                            |
| Na <sub>2</sub> CrTiF <sub>7</sub>             | 0-2                  | 2.31                       | 201                                 | 464                            |
| Na <sub>2</sub> Fe <sub>2</sub> F <sub>7</sub> | 1-3                  | 2.57                       | 181                                 | 467                            |
| Na <sub>2</sub> VTiF <sub>7</sub>              | 0-2                  | 2.25                       | 202                                 | 455                            |
| Na <sub>2</sub> SnSbF <sub>7</sub>             | 0-2                  | 3.20                       | 132                                 | 423                            |
| Na <sub>2</sub> MnCrF <sub>7</sub>             | 1-2                  | 4.46                       | 94                                  | 419                            |
| Na <sub>2</sub> SnBiF <sub>7</sub>             | 0-2                  | 3.29                       | 108                                 | 355                            |
| Na <sub>2</sub> FeCrF <sub>7</sub>             | 1-2                  | 3.68                       | 93                                  | 342                            |
| Na <sub>2</sub> NiVF <sub>7</sub>              | 1-2                  | 3.60                       | 93                                  | 335                            |
| Na <sub>2</sub> CoVF <sub>7</sub>              | 1-2                  | 3.55                       | 93                                  | 330                            |

|                                                |     |      |     |     |
|------------------------------------------------|-----|------|-----|-----|
| Na <sub>2</sub> Ni <sub>2</sub> F <sub>7</sub> | 2-3 | 3.69 | 84  | 310 |
| Na <sub>2</sub> VNbF <sub>7</sub>              | 0-2 | 1.74 | 172 | 299 |
| Na <sub>2</sub> CrNbF <sub>7</sub>             | 0-2 | 1.72 | 172 | 296 |
| Na <sub>2</sub> MnNbF <sub>7</sub>             | 0-2 | 1.73 | 170 | 294 |
| Na <sub>2</sub> CuCoF <sub>7</sub>             | 2-3 | 3.29 | 83  | 273 |
| Na <sub>2</sub> CoNiF <sub>7</sub>             | 2-3 | 3.12 | 84  | 262 |
| Na <sub>2</sub> Cr <sub>2</sub> F <sub>7</sub> | 1-2 | 2.69 | 95  | 256 |
| Na <sub>2</sub> MnBiF <sub>7</sub>             | 1-2 | 4.00 | 61  | 244 |
| Na <sub>2</sub> Co <sub>2</sub> F <sub>7</sub> | 2-3 | 2.71 | 84  | 228 |
| Na <sub>2</sub> Ti <sub>2</sub> F <sub>7</sub> | 0-1 | 2.12 | 106 | 225 |
| Na <sub>2</sub> MnCoF <sub>7</sub>             | 2-3 | 2.65 | 85  | 225 |
| Na <sub>2</sub> FeBiF <sub>7</sub>             | 1-2 | 3.43 | 60  | 206 |
| Na <sub>2</sub> NiTiF <sub>7</sub>             | 1-2 | 1.83 | 94  | 172 |
| Na <sub>2</sub> MnTiF <sub>7</sub>             | 1-2 | 1.60 | 95  | 152 |
| Na <sub>2</sub> VBiF <sub>7</sub>              | 1-2 | 2.39 | 61  | 146 |
| Na <sub>2</sub> FeNiF <sub>7</sub>             | 2-3 | 1.69 | 85  | 144 |
| Na <sub>2</sub> CrBiF <sub>7</sub>             | 1-2 | 2.36 | 61  | 144 |

---



## (IX) Volume changes of weberite compounds upon cycling

**Table S4.** Detailed volume changes of weberite  $\text{Na}_2\text{M}_2\text{F}_7$  compounds upon cycling.

| Formula                            | Volume change (with respect to the volume of the $\text{Na}_2\text{M}_2\text{F}_7$ ) |                                   |                                   |
|------------------------------------|--------------------------------------------------------------------------------------|-----------------------------------|-----------------------------------|
|                                    | $\text{Na}_2\text{M}_2\text{F}_7$                                                    | $\text{Na}_1\text{M}_2\text{F}_7$ | $\text{Na}_0\text{M}_2\text{F}_7$ |
| $\text{Na}_2\text{Ti}_2\text{F}_7$ | 0%                                                                                   | -3.1%                             | 2.8%                              |
| $\text{Na}_2\text{V}_2\text{F}_7$  | 0%                                                                                   | 0.5%                              | 6%                                |
| $\text{Na}_2\text{Cr}_2\text{F}_7$ | 0%                                                                                   | 4.8%                              |                                   |
| $\text{Na}_2\text{Mn}_2\text{F}_7$ | 0%                                                                                   | 4.6%                              | 12.2%                             |
| $\text{Na}_2\text{Fe}_2\text{F}_7$ | 0%                                                                                   | 0.6%                              | 6.3%                              |
| $\text{Na}_2\text{Co}_2\text{F}_7$ | 0%                                                                                   | 2.7%                              | 9.4%                              |
| $\text{Na}_2\text{Ni}_2\text{F}_7$ | 0%                                                                                   | 1.6%                              | 7%                                |

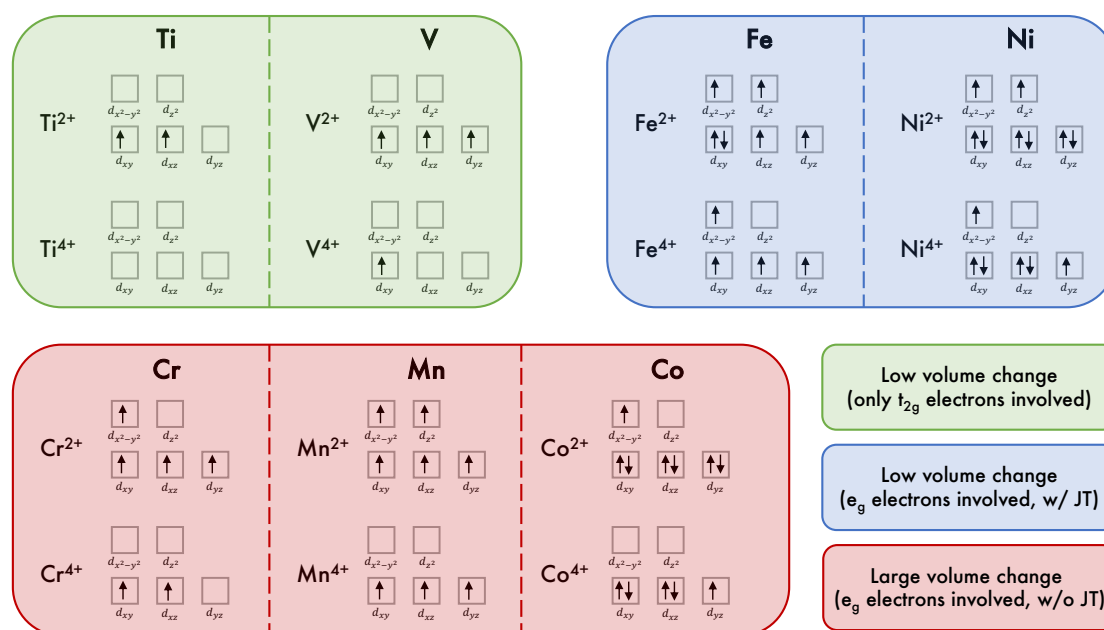

**Figure S19.** Distribution of  $d$ -orbital electrons for 3d transition metals under different oxidation states.

## Supporting References

- [1] H. Park, Y. Lee, M.-k. Cho, J. Kang, W. Ko, Y.H. Jung, T.-Y. Jeon, J. Hong, H. Kim, S.-T. Myung, J. Kim, Na<sub>2</sub>Fe<sub>2</sub>F<sub>7</sub>: a fluoride-based cathode for high power and long life Na-ion batteries, *Energy & Environmental Science*, 14 (2021) 1469-1479.
- [2] J. Kang, J. Ahn, H. Park, W. Ko, Y. Lee, S. Lee, S. Lee, S.K. Jung, J. Kim, Highly Stable Fe<sup>2+</sup>/Ti<sup>3+</sup>-Based Fluoride Cathode Enabling Low-Cost and High-Performance Na-Ion Batteries, *Advanced Functional Materials*, (2022).
- [3] S.P. Ong, L. Wang, B. Kang, G. Ceder, Li–Fe–P–O<sub>2</sub> Phase Diagram from First Principles Calculations, *Chemistry of Materials*, 20 (2008) 1798-1807.
- [4] S.P. Ong, A. Jain, G. Hautier, B. Kang, G. Ceder, Thermal stabilities of delithiated olivine MPO<sub>4</sub> (M=Fe, Mn) cathodes investigated using first principles calculations, *Electrochemistry Communications*, 12 (2010) 427-430.
- [5] M.W. Chase, N.I.S. Organization, NIST-JANAF thermochemical tables, American Chemical Society Washington, DC, 1998.
- [6] J. Speight, *Lange's handbook of chemistry*, McGraw-Hill Education, 2005.
- [7] J. Liao, J. Han, J. Xu, Y. Du, Y. Sun, L. Duan, X. Zhou, Scalable synthesis of Na<sub>2</sub>MVF<sub>7</sub> (M = Mn, Fe, and Co) as high-performance cathode materials for sodium-ion batteries, *Chemical Communications*, 57 (2021) 11497-11500.
- [8] R.E. Doe, K.A. Persson, Y.S. Meng, G. Ceder, First-Principles Investigation of the Li–Fe–F Phase Diagram and Equilibrium and Nonequilibrium Conversion Reactions of Iron Fluorides with Lithium, *Chemistry of Materials*, 20 (2008) 5274-5283.
